# Supplementary material for: Local structure analysis and structure mining for design of photocatalytic metal oxychloride intergrowths
Source: Royal Society of Chemistry journal article supplement (doi:10.1039/d2ta05663a), 2022-01-01
Supplement: d2ta05663a1.pdf [file d2ta05663a1.pdf]

## Supporting Information

### Local Structure Analysis and Structure Mining for Design of Photocatalytic Metal Oxychloride Intergrowths

**Kaustav Chatterjee,<sup>1†</sup> Nicolas Pierre Louis Magnard,<sup>2†</sup> Jette K. Mathiesen,<sup>3†</sup> Kirsten M. Ø.**

**Jensen,<sup>2\*</sup> and Sara E. Skrabalak<sup>1\*</sup>**

*<sup>1</sup>Department of Chemistry, Indiana University—Bloomington, Bloomington, Indiana 47405,  
United States*

*<sup>2</sup>Denmark Department of Chemistry, University of Copenhagen, DK-2100 Copenhagen, Denmark*

*<sup>3</sup>Department of Physics, Technical University of Denmark, DK-2800 Kgs. Lyngby, Denmark*

*† equal contribution*

**Table S1:** Elemental composition of the samples obtained experimentally by SEM-EDS.

|                       | <b>Ta 0%</b> | <b>Ta 25%</b> | <b>Ta 50%</b> | <b>Ta 75%</b> | <b>Ta 100%</b> |
|-----------------------|--------------|---------------|---------------|---------------|----------------|
| <i>Bi/Cl</i>          | 0.48         | 0.43          | 0.38          | 0.32          | 0.23           |
| <i>(Ideal ratios)</i> | 0.5          | 0.44          | 0.38          | 0.31          | 0.25           |
| <i>Ta/Gd</i>          | -            | 0.32          | 0.8           | 2.45          | -              |
| <i>(Ideal ratios)</i> | -            | 0.33          | 1             | 3             | -              |

**Table S2:** Lattice parameters obtained from PDF refinement for Bi<sub>4</sub>TaO<sub>8</sub>Cl phase.

|                          | <b>Ta 0%</b> | <b>Ta 25%</b> | <b>Ta 50%</b> | <b>Ta 75%</b> | <b>Ta 100%</b> |
|--------------------------|--------------|---------------|---------------|---------------|----------------|
| <i>a</i> (Å)             | -            | 5.5285        | 5.4835        | 5.4513        | 5.4478         |
| <i>b</i> (Å)             | -            | 5.4526        | 5.4616        | 5.4986        | 5.4985         |
| <i>c</i> (Å)             | -            | 28.5241       | 28.6917       | 28.8018       | 28.8076        |
| Volume (Å <sup>3</sup> ) | -            | 859.8504      | 859.2786      | 863.3201      | 862.9238       |

**Table S3:** Lattice parameters obtained from PDF refinement for Bi<sub>2</sub>GdO<sub>4</sub>Cl phase.

|                          | <b>Ta 0%</b> | <b>Ta 25%</b> | <b>Ta 50%</b> | <b>Ta 75%</b> | <b>Ta 100%</b> |
|--------------------------|--------------|---------------|---------------|---------------|----------------|
| <i>a=b</i> (Å)           | 3.8812       | 3.8857        | 3.8913        | 3.8851        | -              |
| <i>c</i> (Å)             | 8.9509       | 8.9558        | 8.9614        | 8.9917        | -              |
| Volume (Å <sup>3</sup> ) | 134.8338     | 135.2206      | 135.6955      | 135.7207      | -              |

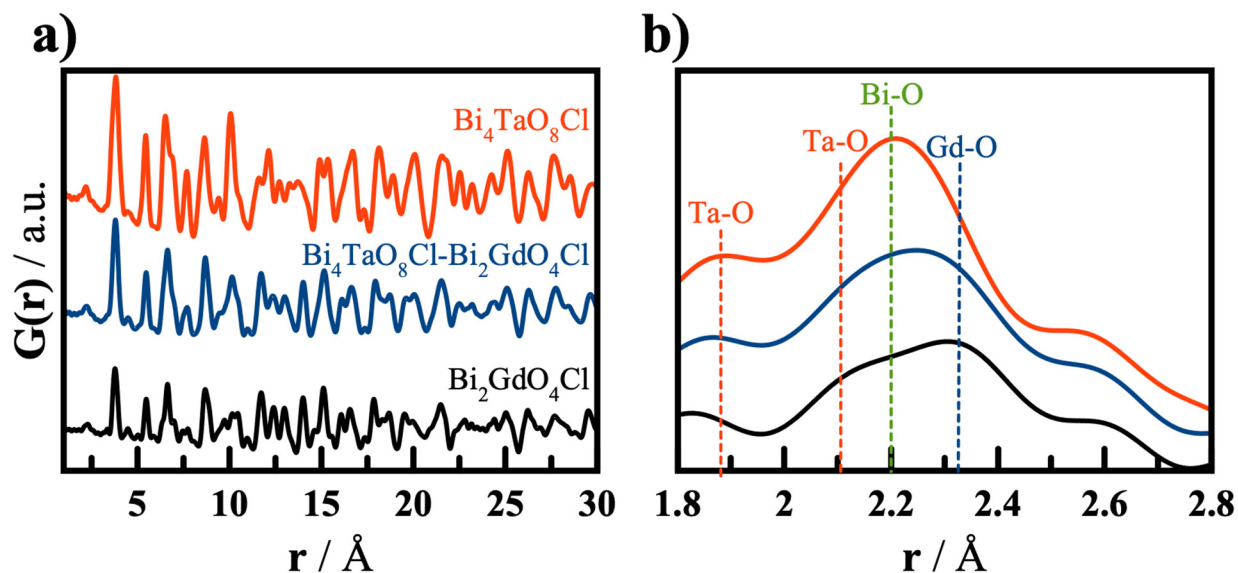

**Figure S1:** (a) PDFs of Ta 100% (red) and Ta 50% (blue) and Ta 0% (black) phases. (b) shows the local M-O environment of the parent phases, where both Ta-O, Gd-O and Bi-O can be observed.

**Table S4:** Refined atomic coordinates and isotropic thermal parameters of the pure  $\text{Bi}_2\text{GdO}_4\text{Cl}$  phase obtained from PDF refinements. Only the refined values are listed below. The atomic positions are constrained from the parent structure space group.

| Atoms | x | y | z      | $u_{11}$ | $u_{22}$ | $u_{33}$ |
|-------|---|---|--------|----------|----------|----------|
| Bi    | - | - | 0.2835 | 0.0079   | 0.0065   | 0.0097   |
| Bi    | - | - | 0.7165 | 0.0079   | 0.0065   | 0.0097   |
| Gd    | - | - | -      | 0.0071   | 0.0071   | 0.0071   |
| O     | - | - | -      | 0.0161   | 0.0160   | 0.1229   |
| Cl    | - | - | -      | 0.0282   | 0.0282   | 0.0282   |

**Table S5:** Refined atomic coordinates and isotropic thermal parameters of the Ta 25% phase in the intergrown sample obtained from PDF refinements. Only the refined values are listed below. The atomic positions are constrained from the parent structure space group.

| Atoms | x      | y      | z      | $u_{11}$ | $u_{22}$ | $u_{33}$ |
|-------|--------|--------|--------|----------|----------|----------|
| Ta    | 0.0319 | 0.2407 | 0.7551 | -0.0015  | -0.0015  | -0.0015  |
| Ta    | 0.5319 | 0.7593 | 0.2449 | -0.0015  | -0.0015  | -0.0015  |

|    |        |        |        |         |         |         |
|----|--------|--------|--------|---------|---------|---------|
| Ta | 0.5319 | 0.7407 | 0.7449 | -0.0015 | -0.0015 | -0.0015 |
| Ta | 0.0319 | 0.2593 | 0.2551 | -0.0015 | -0.0015 | -0.0015 |
| Bi | 0.0349 | 0.7041 | 0.6573 | 0.0021  | 0.0071  | 0.0015  |
| Bi | 0.5349 | 0.2959 | 0.3427 | 0.0021  | 0.0071  | 0.0015  |
| Bi | 0.5349 | 0.2041 | 0.8427 | 0.0021  | 0.0071  | 0.0015  |
| Bi | 0.0349 | 0.7959 | 0.1573 | 0.0021  | 0.0071  | 0.0015  |
| Bi | 0.0409 | 0.2394 | 0.9324 | 0.0021  | 0.0071  | 0.0015  |
| Bi | 0.5409 | 0.7606 | 0.0676 | 0.0021  | 0.0071  | 0.0015  |
| Bi | 0.5409 | 0.7394 | 0.5676 | 0.0021  | 0.0071  | 0.0015  |
| Bi | 0.0409 | 0.2606 | 0.4324 | 0.0021  | 0.0071  | 0.0015  |
| Bi | 0.0574 | 0.7270 | 0.8378 | 0.0021  | 0.0071  | 0.0015  |
| Bi | 0.5574 | 0.2729 | 0.1622 | 0.0021  | 0.0071  | 0.0015  |
| Bi | 0.5574 | 0.2270 | 0.6622 | 0.0021  | 0.0071  | 0.0015  |
| Bi | 0.0574 | 0.7729 | 0.3378 | 0.0021  | 0.0071  | 0.0015  |
| Bi | 0.0497 | 0.2295 | 0.5681 | 0.0021  | 0.0071  | 0.0015  |
| Bi | 0.5497 | 0.7706 | 0.4319 | 0.0021  | 0.0071  | 0.0015  |
| Bi | 0.5497 | 0.7295 | 0.9319 | 0.0021  | 0.0071  | 0.0015  |
| Bi | 0.0496 | 0.2706 | 0.0681 | 0.0021  | 0.0071  | 0.0015  |
| Cl | -      | -      | -      | 0.2119  | 0.2119  | 0.2119  |
| O  | -      | -      | -      | 0.4655  | 0.8944  | 0.0133  |
| Bi | -      | -      | 0.2846 | 0.0079  | 0.0079  | 0.0125  |
| Bi | -      | -      | 0.7155 | 0.0079  | 0.0079  | 0.0125  |
| Gd | -      | -      | -      | 0.0065  | 0.0065  | 0.0065  |
| O  | -      | -      | -      | 0.0459  | 0.0458  | 0.0708  |
| Cl | -      | -      | -      | 0.0247  | 0.0247  | 0.0247  |

**Table S6:** Refined atomic coordinates and isotropic thermal parameters of the Ta 50% phase in the intergrown sample obtained from PDF refinements. Only the refined values are listed below. The atomic positions are constrained from the parent structure space group.

| Atoms | x       | y      | z      | u <sub>11</sub> | u <sub>22</sub> | u <sub>33</sub> |
|-------|---------|--------|--------|-----------------|-----------------|-----------------|
| Ta    | -0.0075 | 0.2407 | 0.7551 | 0.0047          | 0.0047          | 0.0047          |
| Ta    | 0.4925  | 0.7593 | 0.2449 | 0.0047          | 0.0047          | 0.0047          |
| Ta    | 0.4925  | 0.7407 | 0.7449 | 0.0047          | 0.0047          | 0.0047          |
| Ta    | -0.0075 | 0.2593 | 0.2551 | 0.0047          | 0.0047          | 0.0047          |
| Bi    | 0.0336  | 0.7122 | 0.6543 | 0.0044          | 0.0089          | 0.0081          |
| Bi    | 0.5336  | 0.2878 | 0.3457 | 0.0044          | 0.0089          | 0.0081          |
| Bi    | 0.5336  | 0.2123 | 0.8457 | 0.0044          | 0.0089          | 0.0081          |
| Bi    | 0.0336  | 0.7878 | 0.1543 | 0.0044          | 0.0089          | 0.0081          |
| Bi    | 0.0154  | 0.2487 | 0.9319 | 0.0044          | 0.0089          | 0.0081          |
| Bi    | 0.5154  | 0.7513 | 0.0680 | 0.0044          | 0.0089          | 0.0081          |
| Bi    | 0.5154  | 0.7487 | 0.5680 | 0.0044          | 0.0089          | 0.0081          |
| Bi    | 0.0154  | 0.2513 | 0.4319 | 0.0044          | 0.0089          | 0.0081          |
| Bi    | 0.0461  | 0.7303 | 0.8399 | 0.0044          | 0.0089          | 0.0081          |
| Bi    | 0.5461  | 0.2697 | 0.1600 | 0.0044          | 0.0089          | 0.0081          |
| Bi    | 0.5461  | 0.2303 | 0.6600 | 0.0044          | 0.0089          | 0.0081          |
| Bi    | 0.0461  | 0.7697 | 0.3399 | 0.0044          | 0.0089          | 0.0081          |
| Bi    | 0.0219  | 0.2323 | 0.5676 | 0.0044          | 0.0089          | 0.0081          |
| Bi    | 0.5219  | 0.7677 | 0.4324 | 0.0044          | 0.0089          | 0.0081          |
| Bi    | 0.5219  | 0.7323 | 0.9324 | 0.0044          | 0.0089          | 0.0081          |
| Bi    | 0.0219  | 0.2677 | 0.0676 | 0.0044          | 0.0089          | 0.0081          |
| Cl    | -       | -      | -      | 0.0308          | 0.0308          | 0.0308          |
| O     | -       | -      | -      | -0.0066         | 0.2090          | 0.0211          |
| Bi    | -       | -      | 0.2851 | 0.0076          | 0.0077          | 0.0131          |
| Bi    | -       | -      | 0.7145 | 0.0076          | 0.0077          | 0.0131          |

|    |   |   |   |        |        |        |
|----|---|---|---|--------|--------|--------|
| Gd | - | - | - | 0.0067 | 0.0067 | 0.0067 |
| O  | - | - | - | 0.0197 | 0.0863 | 0.1317 |
| Cl | - | - | - | 0.0247 | 0.0247 | 0.0247 |

**Table S7:** Refined atomic coordinates and isotropic thermal parameters of the Ta 75% phase in the intergrown sample obtained from PDF refinements. Only the refined values are listed below. The atomic positions are constrained from the parent structure space group.

| Atoms | x      | y      | z      | u <sub>11</sub> | u <sub>22</sub> | u <sub>33</sub> |
|-------|--------|--------|--------|-----------------|-----------------|-----------------|
| Ta    | 0.0129 | 0.2556 | 0.7519 | 0.0043          | 0.0043          | 0.0043          |
| Ta    | 0.5129 | 0.7444 | 0.2480 | 0.0043          | 0.0043          | 0.0043          |
| Ta    | 0.5129 | 0.7556 | 0.7480 | 0.0043          | 0.0043          | 0.0043          |
| Ta    | 0.0129 | 0.2444 | 0.2519 | 0.0043          | 0.0043          | 0.0043          |
| Bi    | 0.0328 | 0.6941 | 0.6566 | 0.0070          | 0.0077          | 0.0101          |
| Bi    | 0.5328 | 0.3059 | 0.3434 | 0.0070          | 0.0077          | 0.0101          |
| Bi    | 0.5328 | 0.1941 | 0.8434 | 0.0070          | 0.0077          | 0.0101          |
| Bi    | 0.0328 | 0.8059 | 0.1566 | 0.0070          | 0.0077          | 0.0101          |
| Bi    | 0.0174 | 0.2421 | 0.9324 | 0.0070          | 0.0077          | 0.0101          |
| Bi    | 0.5174 | 0.7579 | 0.0677 | 0.0070          | 0.0077          | 0.0101          |
| Bi    | 0.5174 | 0.7421 | 0.5677 | 0.0070          | 0.0077          | 0.0101          |
| Bi    | 0.0174 | 0.2579 | 0.4324 | 0.0070          | 0.0077          | 0.0101          |
| Bi    | 0.0613 | 0.7237 | 0.8419 | 0.0070          | 0.0077          | 0.0101          |
| Bi    | 0.5613 | 0.2763 | 0.1580 | 0.0070          | 0.0077          | 0.0101          |
| Bi    | 0.5613 | 0.2237 | 0.6580 | 0.0070          | 0.0077          | 0.0101          |
| Bi    | 0.0613 | 0.7763 | 0.3419 | 0.0070          | 0.0077          | 0.0101          |
| Bi    | 0.0342 | 0.2449 | 0.5678 | 0.0070          | 0.0077          | 0.0101          |
| Bi    | 0.5342 | 0.7551 | 0.4322 | 0.0070          | 0.0077          | 0.0101          |
| Bi    | 0.5342 | 0.7449 | 0.9322 | 0.0070          | 0.0077          | 0.0101          |

|    |        |        |        |        |        |        |
|----|--------|--------|--------|--------|--------|--------|
| Bi | 0.0342 | 0.2551 | 0.0678 | 0.0070 | 0.0077 | 0.0101 |
| Cl | -      | -      | -      | 0.0461 | 0.0461 | 0.0461 |
| O  | -      | -      | -      | 0.0036 | 0.2491 | 0.0052 |
| Bi | -      | -      | 0.2833 | 0.0082 | 0.0071 | 0.0099 |
| Bi | -      | -      | 0.7167 | 0.0082 | 0.0071 | 0.0099 |
| Gd | -      | -      | -      | 0.0070 | 0.0070 | 0.0070 |
| O  | -      | -      | -      | 0.0974 | 0.0123 | 0.0644 |
| Cl | -      | -      | -      | 0.0165 | 0.0165 | 0.0165 |

**Table S8:** Refined atomic coordinates and isotropic thermal parameters of the pure Bi<sub>4</sub>TaO<sub>8</sub>Cl phase obtained from PDF refinements. Only the refined values are listed below. The atomic positions are constrained from the parent structure space group.

| Atoms | x      | y      | z      | u <sub>11</sub> | u <sub>22</sub> | u <sub>33</sub> |
|-------|--------|--------|--------|-----------------|-----------------|-----------------|
| Ta    | 0.0223 | 0.2583 | 0.7527 | 0.0039          | 0.0039          | 0.0039          |
| Ta    | 0.5223 | 0.7418 | 0.2473 | 0.0039          | 0.0039          | 0.0039          |
| Ta    | 0.5223 | 0.7583 | 0.7473 | 0.0039          | 0.0039          | 0.0039          |
| Ta    | 0.0223 | 0.2418 | 0.2527 | 0.0039          | 0.0039          | 0.0039          |
| Bi    | 0.0318 | 0.6923 | 0.6566 | 0.0068          | 0.0078          | 0.0081          |
| Bi    | 0.5318 | 0.3077 | 0.3435 | 0.0068          | 0.0078          | 0.0081          |
| Bi    | 0.5318 | 0.1923 | 0.8435 | 0.0068          | 0.0078          | 0.0081          |
| Bi    | 0.0318 | 0.8077 | 0.1566 | 0.0068          | 0.0078          | 0.0081          |
| Bi    | 0.0287 | 0.2423 | 0.9323 | 0.0068          | 0.0078          | 0.0081          |
| Bi    | 0.5287 | 0.7577 | 0.0676 | 0.0068          | 0.0078          | 0.0081          |
| Bi    | 0.5287 | 0.7423 | 0.5677 | 0.0068          | 0.0078          | 0.0081          |
| Bi    | 0.0287 | 0.2577 | 0.4323 | 0.0068          | 0.0078          | 0.0081          |
| Bi    | 0.0702 | 0.7146 | 0.8408 | 0.0068          | 0.0078          | 0.0081          |
| Bi    | 0.5703 | 0.2854 | 0.1592 | 0.0068          | 0.0078          | 0.0081          |
| Bi    | 0.5703 | 0.2146 | 0.6592 | 0.0068          | 0.0078          | 0.0081          |

|    |        |        |        |        |        |        |
|----|--------|--------|--------|--------|--------|--------|
| Bi | 0.0702 | 0.7854 | 0.3408 | 0.0068 | 0.0078 | 0.0081 |
| Bi | 0.0413 | 0.2429 | 0.5670 | 0.0068 | 0.0078 | 0.0081 |
| Bi | 0.5413 | 0.7572 | 0.4329 | 0.0068 | 0.0078 | 0.0081 |
| Bi | 0.5413 | 0.7429 | 0.9329 | 0.0068 | 0.0078 | 0.0081 |
| Bi | 0.0413 | 0.2572 | 0.0670 | 0.0068 | 0.0078 | 0.0081 |
| Cl | -      | -      | -      | 0.0255 | 0.0255 | 0.0255 |
| O  | -      | -      | -      | 0.0091 | 0.0412 | 0.0268 |

**Table S9:** Selected bond distances in the Ta 75%, Ta 50% and Ta 25% samples

|               | <b>Ta 0%</b> | <b>Ta 25%</b> | <b>Ta 50%</b> | <b>Ta 75%</b> | <b>Ta 100%</b> |
|---------------|--------------|---------------|---------------|---------------|----------------|
| a: Ta-O / Å   | -            | 1.762         | 1.882         | 1.880         | 1.850          |
| b: Ta-O / Å   | -            | 2.199         | 2.091         | 2.093         | 2.123          |
| c: Ta-Ta / Å  | -            | 3.893         | 3.873         | 3.873         | 3.873          |
| a': Gd-O / Å  | 2.396        | 2.398         | 2.401         | 3.401         | -              |
| b': Gd-Gd / Å | 3.881        | 3.886         | 3.891         | 3.885         | -              |



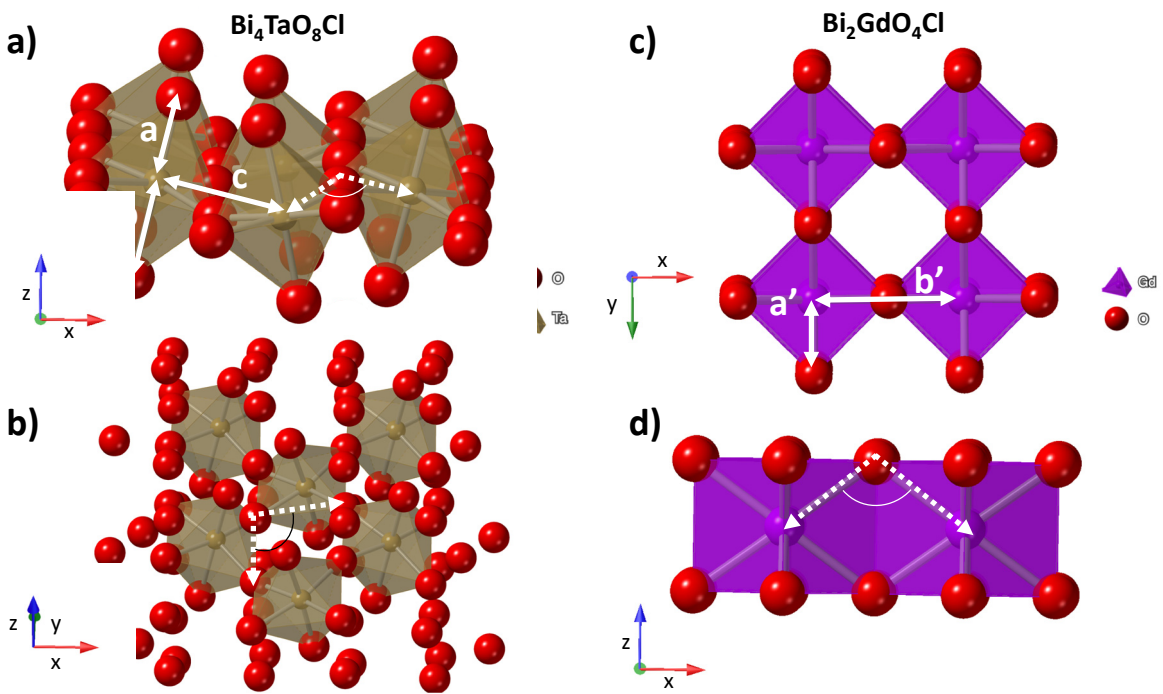

**Figure S2:** Bond distances and angles in (a-b)  $\text{Bi}_4\text{TaO}_8\text{Cl}$  and (c-d)  $\text{Bi}_2\text{GdO}_4\text{Cl}$ . (b) display the angle used to calculate the octahedral tilting in  $\text{Bi}_4\text{TaO}_8\text{Cl}$ .

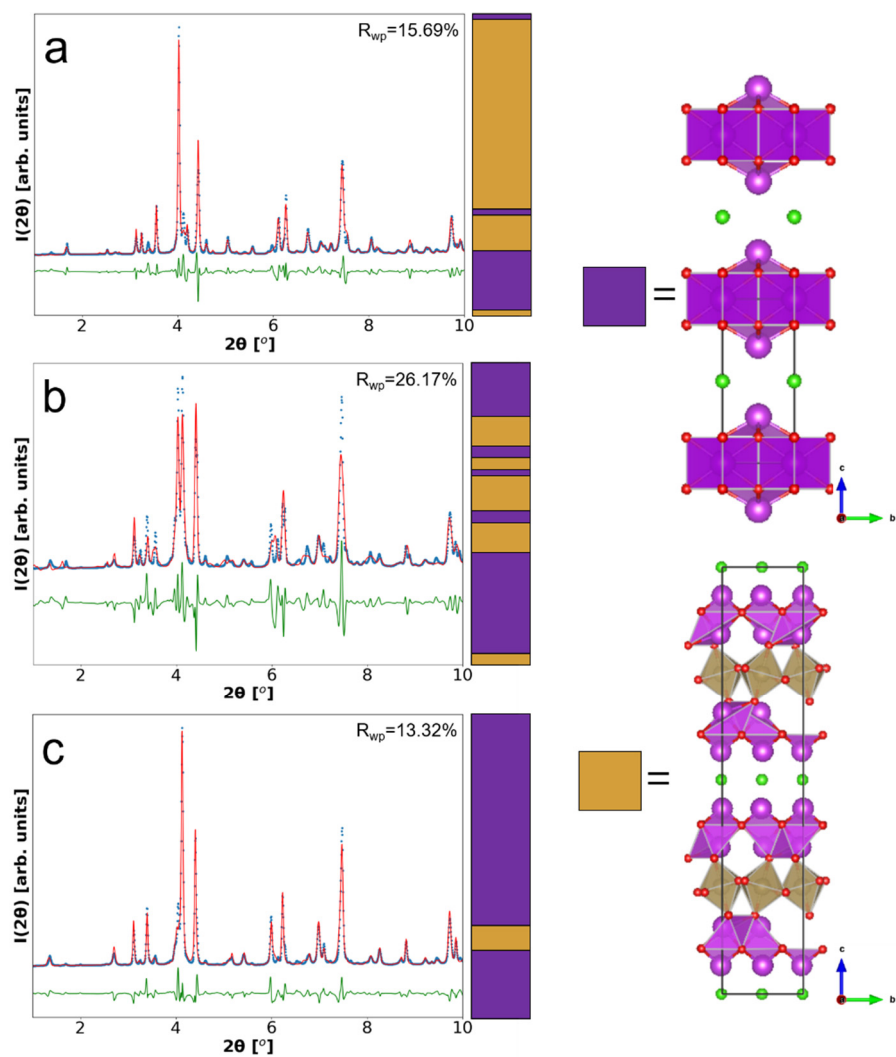

**Figure S3:** Rietveld refinement of the best fit for structure mining of Ta 75% (a), Ta 50% (b) and Ta 25% (c) with experimental data in dotted blue, refined model in red and difference curve in green. The structure of the corresponding superstructure is schematized on the right-side of the plot, with purple bocks corresponding to Gd-domains and brown ones to Ta-domains.

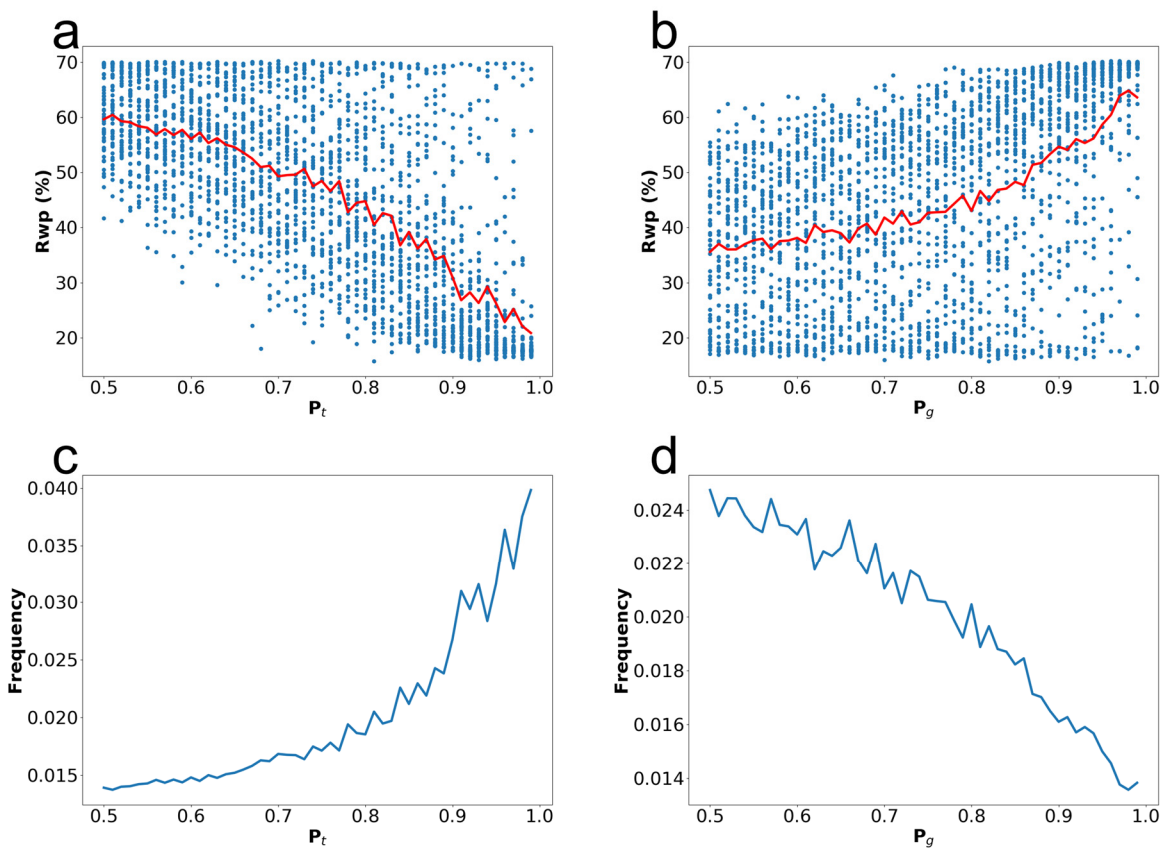

**Figure S4:**  $R_{wp}$  value of the Rietveld refinements of Ta 75% plotted as a function of the  $P_t$  (a) and  $P_g$  (b) values of each supercell. Probability distribution of the stacking probabilities  $P_t$  (c) and  $P_g$  (d).

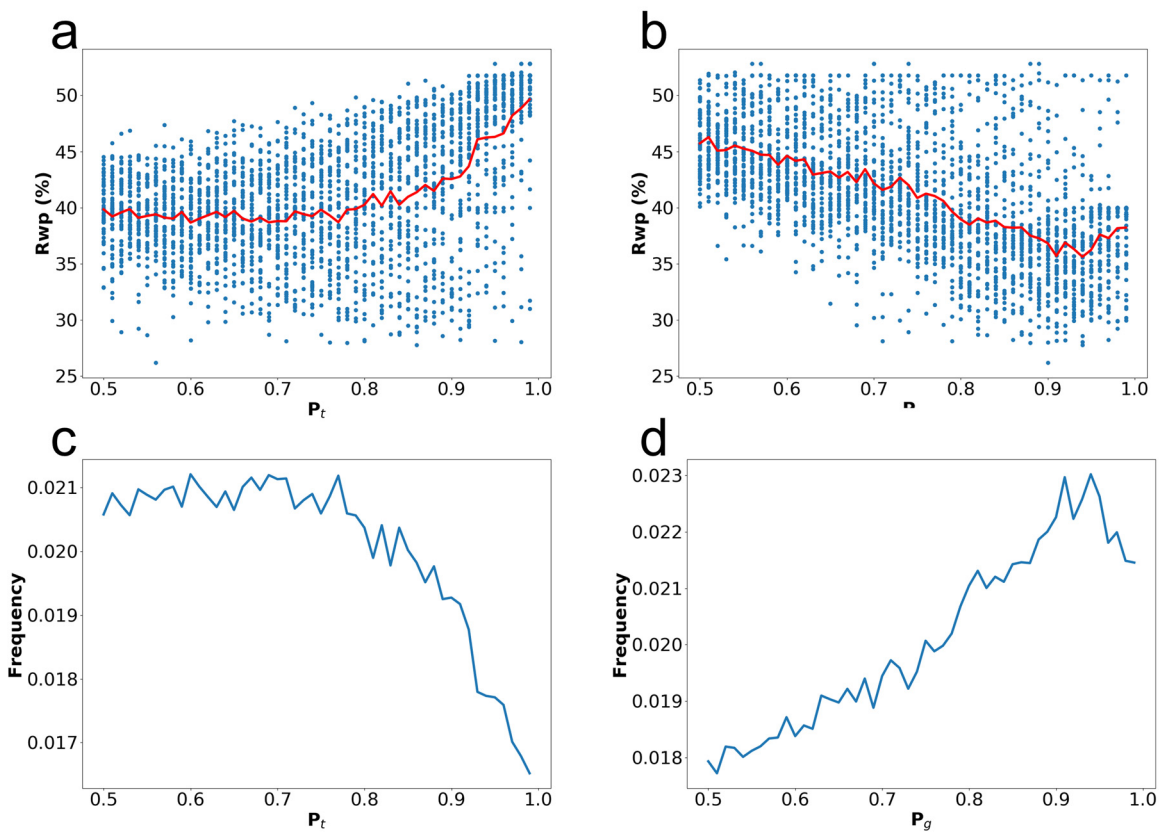

**Figure S5:**  $R_{wp}$  value of the Rietveld refinements of Ta 50% plotted as a function of the  $P_t$  (a) and  $P_g$  (b) values of each supercell. Probability distribution of the stacking probabilities  $P_t$  (c) and  $P_g$  (d).

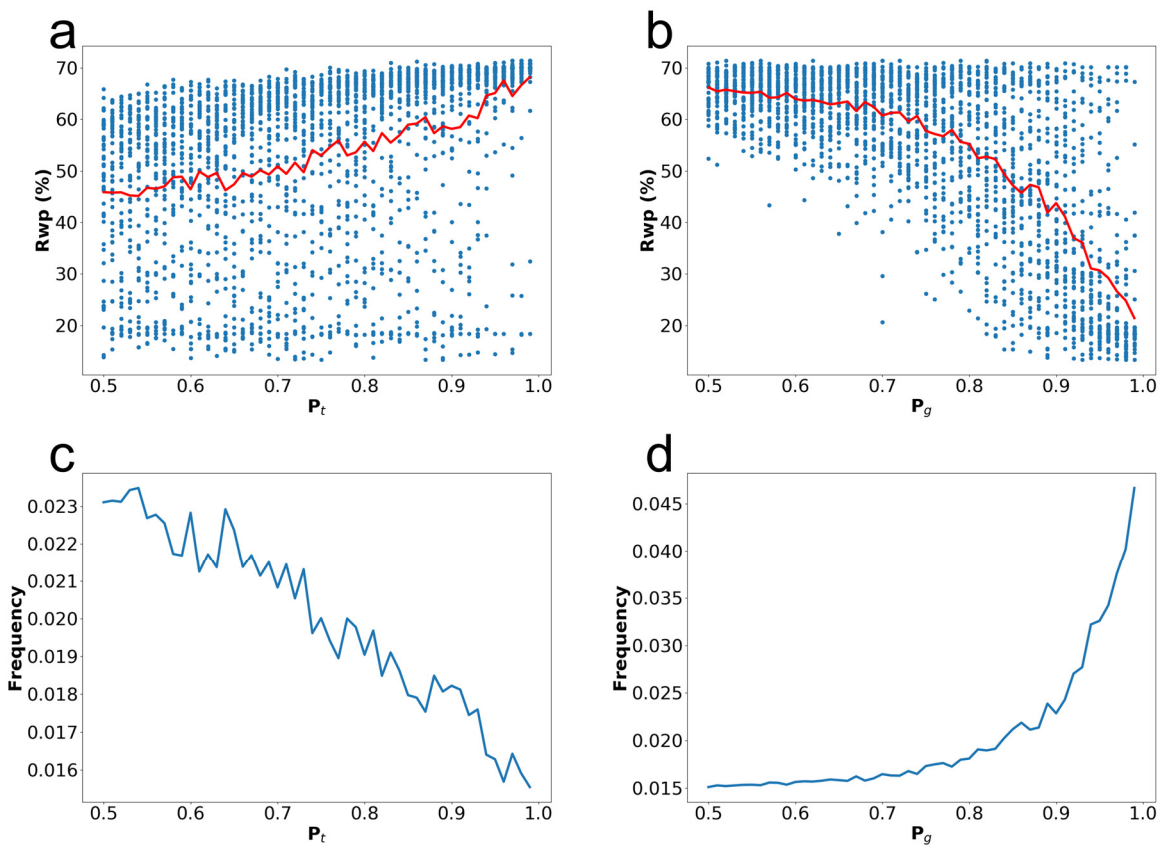

**Figure S6:**  $R_{wp}$  value of the Rietveld refinements of Ta 25% plotted as a function of the  $P_t$  (a) and  $P_g$  (b) values of each supercell. Probability distribution of the stacking probabilities  $P_t$  (c) and  $P_g$  (d).

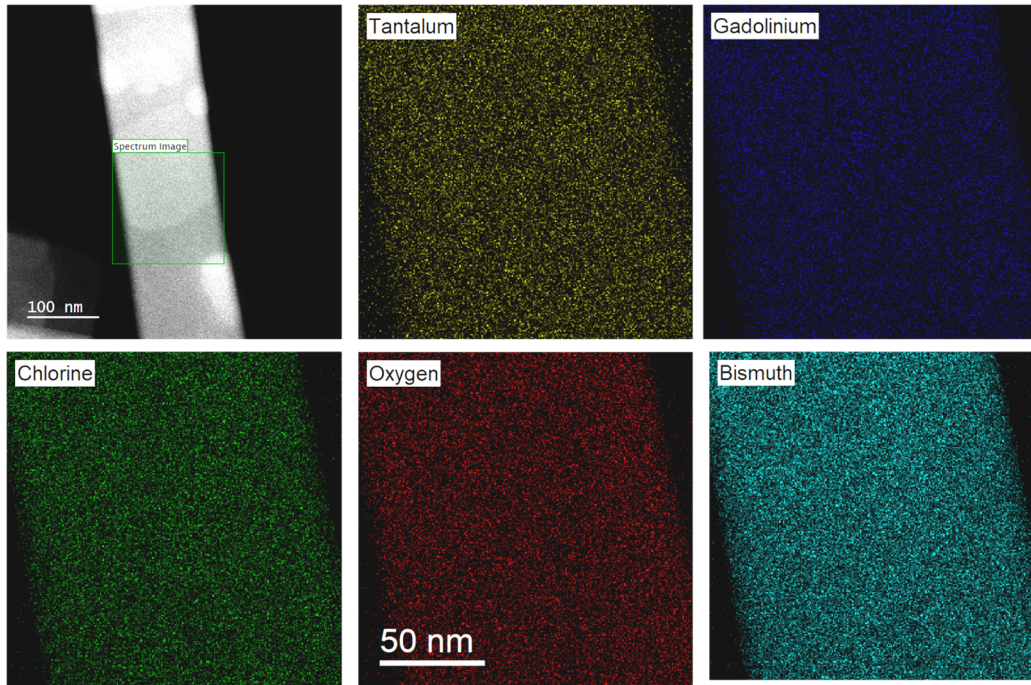

**Figure S7:** Scanning Transmission Electron Microscopy-Energy Dispersive X-ray Spectroscopy mapping of Ta 50% intergrowth.

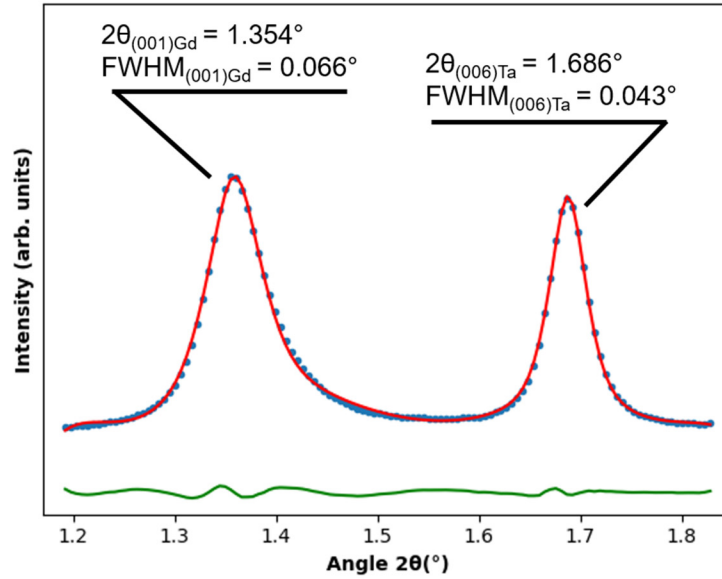

**Figure S8:** Example of fitting of Pseudo-Voigt functions on individual Bragg peaks for building the Williamson-Hall plots. Here the (001) peak of the Gd-phase and (006) peak of the Ta-phase in the XRD pattern of sample Ta 50% are shown as an example. The blue dots correspond to the experimental data, the red curve to the model and the green curve to the difference curve.

**Table S10:**  $R^2$  factor from linear regression performed on each crystallographic plane families on the Williamson-Hall plots.

| Sample | Ta-domain (001) | Ta-domain (011) | Ta-domain (111) | Gd-domain (001) | Gd-domain (011) | Gd-domain (111) |
|--------|-----------------|-----------------|-----------------|-----------------|-----------------|-----------------|
| Ta 75% | 0.663           | 0.040           | 0.228           | 0.746           | 0.611           | 0.928           |
| Ta 50% | 0.216           | 0.620           | 0.188           | 0.001           | 0.290           | 0.268           |
| Ta 25% | 0.317           | 0.692           | 0.017           | 0.076           | 0.835           | 0.139           |
